1 **Research topics and trends of lumbar spondylolisthesis: a**  
2 **bibliometric study with machine-learning based text mining**

3

4 Guoxin Fan, MD<sup>1,2,†</sup>, Jiaqi Qin, BE<sup>3,†</sup>, Yufeng Li<sup>4,†</sup>, Sheng Yang, MD<sup>5,6</sup>, Huaqing Liu, MEdSc<sup>3</sup>,  
5 Shisheng He<sup>5,6,\*</sup>, MD, Xiang Liao, MD<sup>1,2,\*</sup>

6

7 <sup>1</sup> Department of Pain Medicine, Huazhong University of Science and Technology Union Shenzhen  
8 Hospital, Shenzhen, 518060, China.

9 <sup>2</sup> Guangdong Key Laboratory for Biomedical Measurements and Ultrasound Imaging, School of  
10 Biomedical Engineering, Shenzhen University Health Science Center, Shenzhen 518060, China.

11 <sup>3</sup> Artificial Intelligence Innovation Center, Research Institute of Tsinghua, Pearl River Delta,  
12 Guangzhou, 510735, China.

13 <sup>4</sup> Department of Orthopedics, The Eighth Affiliated Hospital Sun Yat-sen University, Shenzhen,  
14 518033, China.

15 <sup>5</sup> Department of Orthopedics, Shanghai Tenth People's Hospital, Tongji University School of  
16 Medicine, Shanghai, 200072, China

17 <sup>6</sup> Spinal Pain Research Institute, Tongji University School of Medicine, Shanghai, 200072, China.

18

19 <sup>†</sup> these three authors equally contribute to the work.

20 \* Corresponding authors:

21 Shisheng He; Email addresses: [tjhss7418@tongji.edu.cn](mailto:tjhss7418@tongji.edu.cn)

22 Mailing address: Department of Orthopedics, Shanghai Tenth People's Hospital, Tongji University  
23 School of Medicine, Shanghai, China

24 Xiang Liao; Email addresses: [digitalxiang@163.com](mailto:digitalxiang@163.com)

25 Mailing address: Department of Pain Medicine, Huazhong University of Science and Technology  
26 Union Shenzhen Hospital, Shenzhen, China

27

28

## 29 **Abstract**

30 Objectives: The study aimed to conduct a bibliometric analysis of publications concerning lumbar  
31 spondylolisthesis, as well as explore its research topics and trends with machine-learning based  
32 text mining.

33 Methods: The data were extracted from the Web of Science Core Collection (WoSCC) database  
34 and analyzed in Rstudio1.3.1. Annual publication production and the top 20 productive authors  
35 over time were presented. Additionally, top 20 productive journals and top 20 impact journals  
36 were compared by spine-subspecialty or not. Similarly, top 20 productive countries/regions and  
37 top 20 impact countries/regions were compared by developed countries/regions or not. The  
38 collaborative relationship among countries and the research trends in the past decade were  
39 presented by R package “Bibliometrix”. Latent Dirichlet allocation (LDA) analysis was conducted  
40 to classify main topics of lumbar spondylolisthesis.

41 Results: Up to 2021, a total number of 4990 articles concerning lumbar spondylolisthesis were  
42 finally included for analysis. Spine-subspecialty journals were found to be dominant in  
43 productivity and impact of the field, and SPINE, EUROPEAN SPINE JOURNAL and JOURNAL  
44 OF NEUROSURGERY-SPINE were the top 3 productive and the top 3 impact journals in this  
45 field. USA, China and Japan have contributed to over half of the publication productivity, but  
46 European countries seemed to publish more influential articles. It seemed that developed  
47 countries/regions tended to produce more articles as well as high influential articles, and  
48 international collaborations focused on USA, Europe and eastern Asia. Publications concerning  
49 emerging surgical technique was the major topic, followed by radiographic measurement and  
50 epidemiology for this field. Cortical bone trajectory, oblique lumbar interbody fusion, oblique  
51 lateral lumbar interbody fusion, lateral lumbar interbody fusion, degenerative lumbar  
52 spondylolisthesis, adjacent segment disease, spinal canal stenosis, minimally invasive  
53 transforaminal lumbar interbody fusion and percutaneous pedicle screw were the recent hotspots  
54 over the past 5 years.

55 Conclusions: The study successfully summarized the productivity and impact of different  
56 countries/regions and journals, which should benefit the journal selection and pursuit of  
57 international collaboration for researcher who were interested in the field of lumbar  
58 spondylolisthesis. Additionally, the current study may encourage more researchers in the field and  
59 somewhat inform their research direction in the future.

60

61 **Keywords:** Bibliometrics, Lumbar Spondylolisthesis, Machine Learning, Latent Dirichlet  
62 allocation, Text Mining

63

64

65

66

67

68

69

## 70 **Introduction:**

71 Lumbar spondylolisthesis, especially in the elderly, is one of the most common causes of low  
72 back pain(1). Lumbar spondylolisthesis is defined as a slip of one vertebra over the other beneath,  
73 causing instability of the segment and compression of the cauda equina(2). The incidence of  
74 lumbar spondylolisthesis is 4-6% in the general population(3), which typically occurs in the  
75 occurs at the fourth and fifth lumbar vertebrae(4). In the United States, approximately 11.5% of  
76 the population suffers from this disease(5). Based on its etiology, lumbar spondylolisthesis can be  
77 divided into isthmic or degenerative spondylolisthesis. The former could be post-traumatic  
78 fractures in the pars interarticularis or congenital defects, while the latter is a result of disorders of  
79 the disc space or degenerative arthritis(6). Currently, the risk factors for spondylolisthesis are  
80 considered to be older age, female gender, larger body mass index and sagittal facet orientation(7).

81 According to the current agreement, the treatment of lumbar spondylolisthesis essentially  
82 incorporates conservative treatment or surgical treatment. The nonsurgical treatment options may  
83 include physical therapy, exercise, epidural steroid injections for pain, and medications. If  
84 conservative therapy fails, a surgical intervention was usually recommended(8). Surgical options  
85 include either decompression alone or decompression with fixation and fusion, with the essential  
86 objectives of neural decompression and stability reconstructions as well as restoration of sagittal  
87 alignment(9). Recently, minimally invasive spine surgery has been widely adopted in surgical  
88 management of lumbar spondylolisthesis(10-12). Therefore, probing and summarizing the  
89 research topics or trends of lumbar spondylolisthesis may benefit potential doctors and researchers  
90 who were interested in this field.

91 Bibliometric analysis is a powerful tool to depict the research activities of a certain field in  
92 details(13). For example, bibliometrics analysis can quantify the contribution of a research field  
93 (including different countries, institutions, journals, or authors), and to identify the research trends  
94 or topics in a particular field(14). Nowadays, bibliometric analysis has been widely adopted in  
95 summarizing medical fields, like emerging techniques(15-17) and common disease(18-20). In  
96 spine field, bibliometric studies about cervical myelopathy(21), spinal stenosis(22), spinal cord  
97 injury(23), scoliosis(24) are thriving. However, no bibliometric study concerning lumbar  
98 spondylolisthesis was available. Meanwhile, latent Dirichlet allocation (LDA) is a popular  
99 machine learning algorithm that has been accepted as a bibliometric tool to obtain research topics  
100 for a specific field(25-27). Thus, the purpose of this work is to explore the research topics and  
101 trends of lumbar spondylolisthesis via bibliometric analysis.

## 102 **Methods:**

### 103 **Data Acquisition**

104 Relevant literatures were collected from the Web of Science Core Collection (WoSCC) database.  
105 The search terms are “spondylolisthesis”. The time interval was set to 1975 to 2021. Only articles  
106 were included, and no language restrictions were applied. To avoid bias incurred by frequent  
107 database renewal, all literature retrieval and data downloads were completed in a single day, Jan  
108 18, 2022. Considering that data were directly downloaded from the data set, ethical approval was  
109 not required. WoSCC data of full record and references (including titles, countries of origin,  
110 institutions, journals, authors, etc.) were extracted in bib format and then imported into the

111 Rstudio1.3.1. for bibliometric analysis.

## 112 **Quantitative analysis**

113 Annual publication production and the top 20 productive authors over time were presented.  
114 Additionally, top 20 productive journals and top 20 impact journals were compared by  
115 spine-subspecialty or not. Similarly, top 20 productive countries/regions and top 20 impact  
116 countries/regions were compared by developed countries/regions or not. The productivity of  
117 journals and countries/regions was measured by the total number of publications, whereas the  
118 impact of journals and countries/regions was assessed by H-index or average article citations (15).  
119 H-index was characterized as the extent that an entity has published at least h papers that have  
120 been each cited at least h times (28). All the data were analyzed by Rstudio1.3.1 and R package  
121 “Bibliometrix” was used to conduct quantitative analysis of different entity’s contributions.

## 122 **Research topics and trends**

123 LDA can create a vocabulary of terms and then classify the included publications into different  
124 topics(18). We used the package “lda” in R language to conduct LDA analysis of included  
125 abstracts. The collaborative relationship among countries and the research trend in the past decade  
126 were presented by R package “Bibliometrix”.

## 127 **Results**

### 128 **General information**

129 Up to 2021, a total number of 4990 articles concerning lumbar spondylolisthesis were finally  
130 included for analysis. Average citations per documents reached 24.43, and average citations per  
131 year per documents reached 1.829. A total of 623 sources were identified while most sources were  
132 academic journals, as only a few articles were book chapters. Annual published articles  
133 concerning lumbar spondylolisthesis kept rising over time (**Figure 1**), and the publications of the  
134 latest 10 years contributed to 56.9% (2841/4990) productivity of this field. Similarly, almost all  
135 the top 20 productive authors published most of their articles concerning lumbar spondylolisthesis  
136 in years between 2010 and 2020.

### 137 **Quantitative analysis**

138 The top 20 productive journals and the top 20 impact journals publishing articles concerning  
139 lumbar spondylolisthesis were listed in **Table 1**. Articles in the top 20 journals (2789) were equal  
140 to 55.89% of all 4990 article publications. “SPINE” was the most productive journal (750 articles)  
141 and the most influential journal (H-index: 102) in the field. Similarly, “EUROPEAN SPINE  
142 JOURNAL” was the second productive (361 articles) and the second influential journal (H-index:  
143 49), while “JOURNAL OF NEUROSURGERY-SPINE” was the third productive (255 articles)  
144 and the third influential journal (H-index: 47). Most articles (1952/2789) were published by  
145 spine-subspecialty journals among the top 20 productive journals, even though only 9  
146 spine-subspecialty journals were in the top 20 productive lists. The top 3 influential journals all  
147 belonged to spine-subspecialty journals, although only one third of the top 20 influential journals  
148 were spine-subspecialty journals (7/20).

149 The top 20 productive and top 20 impact countries/regions publishing articles concerning

150 lumbar spondylolisthesis were listed in **Table 2**. Articles in the top 20 countries/regions (4468)  
151 were equal to 89.54% of all 4990 article publications. USA was the most productive country (1570  
152 articles) in this field, followed by China (536 articles) and Japan (531 articles). It was noted that  
153 Taiwan, as one of the most developed regions in China, accounted for nearly 20% of China's  
154 productive contributions. However, only three non-developed countries were in the top 20  
155 productive list, while developed countries/regions published 86.01% (3843/4468) articles among  
156 the top 20 productive lists. As we ranked the top impact countries/regions by average article  
157 citations, USA only ranked top 7 and Japan ranked top 16, while China was even not in the top 20  
158 influential list. Among this list, only one country belonged to non-developed economic entity.  
159

## 160 **Research topics and trends**

161 After removing articles without abstracts, a total of 4581 articles were finally included for LDA  
162 analysis. We found three major topics in this field, and named them as “Topic 1: surgery”, “Topic  
163 2: radiology” and “Topic 3: epidemiology” (**Figure 2**). The publication proportion of these three  
164 topics were 37.2%, 34.3% and 28.5%, respectively. Additionally, we presented how the  
165 productivity of these three topics evolved over time. It seemed that one third of publications were  
166 concerned about the radiographic measurement of lumbar spondylolisthesis (Topic 2: radiology),  
167 and it kept as the most productive topic for two decades (1990 to 2010). After 2010, publications  
168 concerning all kinds of surgical management (Topic 1: surgery) became the dominant topic, and  
169 publications concerning prevalence, risk factors, quality of life and conservative treatment of  
170 lumbar spondylolisthesis (Topic 3: epidemiology) joined as another mainstream topic after 2015.

171 Using term frequency, we obtained the research trends of lumbar spondylolisthesis over the  
172 past one decade (**Figure 3**). Cortical bone trajectory (CBT), oblique lumbar interbody fusion  
173 (OLIF), oblique lateral lumbar interbody fusion (OLLIF), lateral lumbar interbody fusion (LLIF),  
174 degenerative lumbar spondylolisthesis, adjacent segment disease (ASD), spinal canal stenosis,  
175 minimally invasive transforaminal lumbar interbody fusion (MIS-TLIF) and percutaneous pedicle  
176 screw were the recent hotspots over the past 5 years. **Figure 3** also showed the countries or  
177 regions collaboration map in the lumbar spondylolisthesis field. Countries or region connected  
178 with red lines indicated there were some collaborations among them and the thickness of the red  
179 line was proportional to the number of collaborations. It seemed that USA was the hub country of  
180 publications, because there are lots of red lines radiated from USA to European countries, China,  
181 Korea, Japan and even Australia. Although India, Brazil, China, Japan and some middle eastern  
182 countries were also productive, there were little collaborations among them.  
183

## 184 **Discussion**

185 Text mining and bibliometric analysis have been adopted widely in depicting a certain  
186 academic field in details. The current study quantified different entities' academic contributions to

187 lumbar spondylolisthesis, as well as provided an in-depth and visualized analysis of its topics and  
188 trends. To the best of our knowledge, this was the first bibliometric analysis of lumbar  
189 spondylolisthesis, which might help researchers gain a basic understanding, develop areas of focus  
190 and pursue further practice in this field.

191 Academic contributions of one field could be quantified by publication productivity and  
192 citation activity. The current study mainly quantified the contributions of different journals and  
193 countries in the field of lumbar spondylolisthesis. It seemed that SPINE, EUROPEAN SPINE  
194 JOURNAL and JOURNAL OF NEUROSURGERY-SPINE were the prior journals for researchers  
195 to follow or submit their own works, as these three journals were the top 3 productive and the top  
196 3 impact journals in this field. Additionally, other spine-subspecialty journals like SPINE  
197 JOURNAL could be the second-line options, as spine-subspecialty journals were found to be  
198 dominant in productivity and impact of the field. For country/region contributions, USA, China  
199 and Japan have contributed to over half of the publication productivity. However, European  
200 countries seemed to publish more influential articles, as their average article citations were much  
201 higher. It seemed that developed countries/regions tended to produce more articles as well as high  
202 influential articles, as there were only a few non-developed countries/regions among the top 20  
203 productive and the top 20 influential lists. Additionally, researchers may need to focus on USA,  
204 Europe and eastern Asia, if they need collaborations in the field of lumbar spondylolisthesis.

205 Natural language processing (NLP) is a popular research field where human language could  
206 be decoded by machine learning, which has been adopted to analyze academic publications  
207 recently(29). LDA is one of the most widely used machine learning algorithms in NLP(18, 25, 26),  
208 as it is scalable, computationally fast and close to what the human mind assigns while decoding  
209 text words. In the study, publications of Topic 2 remained as the dominant topic from 1990 to  
210 2010, when all kinds of radiographic equipment spread over the world gradually. We assumed that  
211 the widespread of radiographic equipment enabled researchers to pay more attention to lumbar  
212 instability and thus identify key parameters of sagittal balance. These publications (Topic 2) did  
213 improve the knowledge of lumbar spondylolisthesis like classification(30) or sagittal balance(31),  
214 which was of great significance of guiding the management of lumbar spondylolisthesis(32-34).  
215 Publications of Topic 1 kept as the most productive topic after 2010, which could be explained by  
216 the emerging minimally invasive surgical technique and the lack of agreement on the best surgical  
217 approaches(35), as well as the controversy of the addition of fusion to decompression(36).  
218 Publications of Topic 3 gradually became the mainstream topic after 2015, which indicated the  
219 importance of systematic management of lumbar spondylolisthesis. As most spondylolisthesis  
220 patients were asymptomatic and only a few patients seeking treatment will have surgery, doctors  
221 from different subspecialties might hold different viewpoints about best options of nonoperative  
222 treatments, as well as their dosage and progression of physical therapy procedures(6). Failed  
223 conservative treatment would lead to more than double medical costs than those in the  
224 successfully treated cohort(37).

225 While major topics with historical perspective quickly informed potential researchers about  
226 the macroscopic picture of one academic field and how it evolved, recent hotspots might guide the  
227 future researches. The current study identified CBT, OLIF, OLLIF, LLIF, MIS-TLIF, percutaneous  
228 pedicle screw, degenerative lumbar spondylolisthesis, spinal canal stenosis and ASD were the  
229 research hotspots over the past 5 years. Interestingly, most of these hotspots (the first six) belong  
230 to minimally invasive surgical techniques, and all of them were derivatives of internal fixation or

231 fusion technique instead of decompression. It was not a surprise as decompression technique has  
232 developed for decades, but internal fixation and fusion technique could be easily modified with  
233 different approaches and novel devices. Unlike the novel concept of the first six hotspots, spine  
234 physicians or surgeons might not be unfamiliar with degenerative lumbar spondylolisthesis, spinal  
235 canal stenosis and ASD. Degenerative lumbar spondylolisthesis became a hotspot instead of  
236 isthmic spondylolisthesis might be explained by growing aging population and higher prevalence  
237 of lumbar degeneration. Lumbar spondylolisthesis often accompanied by spinal canal stenosis and  
238 ASD is a common complication of spinal fusion, which indicated continuous attentions have been  
239 paid to these traditional problems.

240 Since most hotspots belonged to publications of Topic 1 (surgery), it was necessary to depict  
241 these surgical hotspots in details. CBT, as a caudal-to-rostral and medial-to-lateral pedicle screw  
242 insertion method, has merits of great fixation and pull-out strength even in osteoporosis patients  
243 due to its trajectory goes through cortical bone(38). Thus, CBT became popular in all kinds of  
244 spinal fusion including lumbar spondylolisthesis(39-41). Percutaneous pedicle screw is another  
245 widespread fixation technique with traditional trajectory, but its merits of minimally invasiveness  
246 popularized its utility in OLIF, OLLIF, LLIF and MIS-TLIF etc. OLIF takes an anterior  
247 retroperitoneal approach surgery through a small incision(42). Within the retroperitoneal space,  
248 surgeons will drag the psoas muscle backward, expose the intervertebral space between the psoas  
249 muscle and the abdominal aorta, and then perform decompression plus fusion, which is usually  
250 followed by posterior fixation of percutaneous pedicle screw. OLLIF is another minimally  
251 invasive fusion surgery described by AbbasiH in details in 2015(43). OLLIF uses the classic  
252 YESS endoscopy trajectory technology to establish a working channel, and then enters the  
253 intervertebral disc through Kambin's triangle to complete discectomy and intervertebral fusion  
254 under full-endoscopy(44). LLIF or extreme lateral interbody fusion (XLIF) is another minimally  
255 invasive surgery by bluntly separate the psoas muscle to the lateral side of the intervertebral  
256 space(45, 46). It should be noted that muscle separation may damage the lumbar plexus, so  
257 intraoperative neuromonitoring is required for LLIF/XLIF. MIS-TLIF takes a small paramedial  
258 incision, and the ipsilateral articular process will be excised to expose the intervertebral foraminal  
259 window, through which decompression and fusion are performed(47). It is reported that MIS-TLIF  
260 has become one of the most widespread fusion surgeries(48).

261 The current study may have some limitations. First, we only analyzed articles from the  
262 WoSCC database, so publications not indexed in the WoSCC database were not considered and  
263 citation counts might be underestimated. Second, the study mainly analyzed some useful  
264 information (e.g. abstracts, titles, etc.) of the included publications instead of reviewing full texts.  
265 Last but may not least, as the WoSCC database kept updating and records of 2022 were not  
266 complete, we only analyzed the data by 2021, which might not reflect the most recent trends of  
267 2022.

268

## 269 **Conclusions**

270 The study successfully summarized the productivity and impact of different countries/regions and  
271 journals, which should benefit the journal selection and pursuit of international collaboration for  
272 researcher who were interested in the field of lumbar spondylolisthesis. Publications concerning  
273 emerging surgical technique was the major topic, followed by radiographic measurement and



274 epidemiology for this field. CBT, OLIF, OLLIF, LLIF, MIS-TLIF, percutaneous pedicle screw,  
275 degenerative lumbar spondylolisthesis, spinal canal stenosis and ASD were the research hotspots  
276 of lumbar spondylolisthesis over the past 5 years. With macroscopic plus detailed analysis of  
277 publications concerning lumbar spondylolisthesis, the current study may encourage more  
278 researchers in the field and somewhat inform their research direction in the future.  
279

## 280 **References:**

- 281 1. Bydon M, Alvi MA, Goyal A. Degenerative Lumbar Spondylolisthesis: Definition, Natural  
282 History, Conservative Management, and Surgical Treatment. *Neurosurg Clin N Am.*  
283 2019;30(3):299-304.
- 284 2. Fan G, Zhang H, Guan X, Gu G, Wu X, Hu A, et al. Patient-reported and radiographic outcomes  
285 of minimally invasive transforaminal lumbar interbody fusion for degenerative spondylolisthesis with  
286 or without reduction: A comparative study. *J Clin Neurosci.* 2016;33:111-8.
- 287 3. Standaert CJ, Herring SA. Spondylolysis: a critical review. *Br J Sports Med.* 2000;34(6):415-22.
- 288 4. Zhang S, Ye C, Lai Q, Yu X, Liu X, Nie T, et al. Double-level lumbar spondylolysis and  
289 spondylolisthesis: A retrospective study. *J Orthop Surg Res.* 2018;13(1):55.
- 290 5. Kalichman L, Kim DH, Li L, Guermazi A, Berkin V, Hunter DJ. Spondylolysis and  
291 spondylolisthesis: prevalence and association with low back pain in the adult community-based  
292 population. *Spine (Phila Pa 1976).* 2009;34(2):199-205.
- 293 6. Vanti C, Ferrari S, Guccione AA, Pillastrini P. Lumbar spondylolisthesis: STATE of the art on  
294 assessment and conservative treatment. *Archives of physiotherapy.* 2021;11(1):19.
- 295 7. Ferrero E, Guigui P. Current trends in the management of degenerative lumbar spondylolisthesis.  
296 *EFORT Open Rev.* 2018;3(5):192-9.
- 297 8. Faldini C, Pagkrati S, Acri F, Miscione MT, Francesconi D, Giannini S. Surgical treatment of  
298 symptomatic degenerative lumbar spondylolisthesis by decompression and instrumented fusion: *J*  
299 *Orthop Traumatol.* 2007 Sep;8(3):128-33. doi: 10.1007/s10195-007-0079-7. Epub 2007 Sep 17.
- 300 9. Fan G, Gu G, Zhu Y, Guan X, Hu A, Wu X, et al. Minimally Invasive Transforaminal Lumbar  
301 Interbody Fusion for Isthmic Spondylolisthesis: In Situ Versus Reduction. *World Neurosurg.*  
302 2016;90:580-7.e1.
- 303 10. Kwon JW, Park Y, Lee BH, Yoon SR, Ha JW, Kim H, et al. Ten-Year Outcomes of Minimally  
304 Invasive Versus Open Transforaminal Lumbar Interbody Fusion in Patients With Single-Level Lumbar  
305 Spondylolisthesis. *Spine (Phila Pa 1976).* 2022.
- 306 11. Chang M, Wang L, Yuan S, Tian Y, Zhao Y, Liu X. Percutaneous Endoscopic Robot-Assisted  
307 Transforaminal Lumbar Interbody Fusion (PE RA-TLIF) for Lumbar Spondylolisthesis: A Technical  
308 Note and Two Years Clinical Results. *Pain physician.* 2022;25(1):E73-e86.
- 309 12. Haddas R, Lieberman I, Block A, Derman P. The Effect of Surgical Decompression and Fusion on  
310 Functional Balance in Patients With Degenerative Lumbar Spondylolisthesis. *Spine (Phila Pa 1976).*  
311 2020;45(14):E878-e84.
- 312 13. Da W, Tao Z, Meng Y, Wen K, Zhou S, Yang K, et al. A 10-year bibliometric analysis of  
313 osteosarcoma and cure from 2010 to 2019. *BMC Cancer.* 2021;21(1):115.
- 314 14. Tao L, Zhou S, Tao Z, Wen K, Da W, Meng Y, et al. The publication trends and hot spots of  
315 scoliosis research from 2009 to 2018: a 10-year bibliometric analysis. *Ann Transl Med.* 2020;8(6):365.
- 316 15. Ding H, Wu C, Liao N, Zhan Q, Sun W, Huang Y, et al. Radiomics in Oncology: A 10-Year



- 317 Bibliometric Analysis. *Frontiers in oncology*. 2021;11:689802.
- 318 16. Wang Q, Yang KL, Zhang Z, Wang Z, Li C, Li L, et al. Characterization of Global Research  
319 Trends and Prospects on Single-Cell Sequencing Technology: Bibliometric Analysis. *Journal of*  
320 *medical Internet research*. 2021;23(8):e25789.
- 321 17. Shi J, Gao Y, Ming L, Yang K, Sun Y, Chen J, et al. A bibliometric analysis of global research  
322 output on network meta-analysis. *BMC medical informatics and decision making*. 2021;21(1):144.
- 323 18. Zhang Z, Wang Z, Huang Y. A Bibliometric Analysis of 8,276 Publications During the Past 25  
324 Years on Cholangiocarcinoma by Machine Learning. *Frontiers in oncology*. 2021;11:687904.
- 325 19. Lin H, Wang X, Huang M, Li Z, Shen Z, Feng J, et al. Research hotspots and trends of bone  
326 defects based on Web of Science: a bibliometric analysis. *Journal of orthopaedic surgery and research*.  
327 2020;15(1):463.
- 328 20. Guo Y, Xu ZY, Cai MT, Gong WX, Shen CH. Epilepsy With Suicide: A Bibliometrics Study and  
329 Visualization Analysis via CiteSpace. *Frontiers in neurology*. 2021;12:823474.
- 330 21. Yin M, Xu C, Ma J, Ye J, Mo W. A Bibliometric Analysis and Visualization of Current Research  
331 Trends in the Treatment of Cervical Spondylotic Myelopathy. *Global spine journal*. 2021;11(6):988-98.
- 332 22. Yin M, Wang H, Sun Y, Xu C, Ye J, Ma J, et al. Global Trends of Researches on Lumbar Spinal  
333 Stenosis: A Bibliometric and Visualization Study. *Clinical spine surgery*. 2022;35(1):E259-e66.
- 334 23. Li Y, Wei B, Zhong Y, Feng H, Wu H. A bibliometric analysis of global research on spinal cord  
335 injury: 1999-2019. *Spinal cord*. 2021.
- 336 24. Zhao T, Li Y, Dai Z, Zhang J, Zhang L, Shao H, et al. Bibliometric Analysis of the Scientific  
337 Literature on Adolescent Idiopathic Scoliosis. *World neurosurgery*. 2021;151:e265-e77.
- 338 25. Wang K, Feng C, Li M, Pei Q, Tan F. A bibliometric analysis of 23,492 publications on rectal  
339 cancer by machine learning: basic medical research is needed. *Therapeutic Advances in*  
340 *Gastroenterology*. 2020;13:175628482093459.
- 341 26. Stout NL, Alfano CM, Belter CW, Nitkin R, Cernic H A, Siegel KL, et al. A Bibliometric  
342 Analysis of the Landscape of Cancer Rehabilitation Research (1992–2016). *JNCI: Journal of the*  
343 *National Cancer Institute*. 2018.
- 344 27. Zhang Z, Yao L, Wang W, Jiang B, Xia F, Li X. A Bibliometric Analysis of 34,692 Publications on  
345 Thyroid Cancer by Machine Learning: How Much Has Been Done in the Past Three Decades?  
346 *Frontiers in oncology*. 2021;11:673733.
- 347 28. Garfield E. The history and meaning of the journal impact factor. *Jama*. 2006;295(1):90-3.
- 348 29. Chen X, Xie H, Fu LW, Liu Z, Xu J, Hao T. A bibliometric analysis of natural language  
349 processing in medical research. *Bmc Medical Informatics & Decision Making*. 2018;18(1):14.
- 350 30. Martikos K, Gregg T, Faldini C. High grade isthmic spondylolisthesis; can reduction always  
351 re-align the unbalanced pelvis? *BMC musculoskeletal disorders*. 2019;20(1):499.
- 352 31. Zhang GZ, Deng YJ, He XG, Ren EH, Wu ZL, Yang FG, et al. Different Types of Double-Level  
353 Degenerative Lumbar Spondylolisthesis: What Is Different in the Sagittal Plane? *World neurosurgery*.  
354 2021;150:e127-e34.
- 355 32. Wang S, Zhou Q, Xu L, Wang M, Qiu Y, Zhu Z, et al. Impact of lumbar fusion on sitting  
356 spinopelvic balance: Multisegmental versus monosegmental. *Clinical neurology and neurosurgery*.  
357 2021;209:106905.
- 358 33. Shao X, Liu H, Wu J, Qian Z, Qu R, Liu T. A retrospective comparative study of postoperative  
359 sagittal balance in isthmic L5-S1 spondylolisthesis using single segment or two-segment pedicle screw  
360 fixation. *BMC musculoskeletal disorders*. 2022;23(1):145.

- 361 34. Pan W, Zhao JL, Xu J, Zhang M, Fang T, Yan J, et al. Lumbar alignment and patient-reported  
362 outcomes after single-level transforaminal lumbar interbody fusion for degenerative lumbar  
363 spondylolisthesis with and without local coronal imbalance. *Journal of neurosurgery Spine*. 2020:1-7.
- 364 35. Akkawi I, Zmerly H. Degenerative Spondylolisthesis: A Narrative Review. *Acta bio-medica* :  
365 *Atenei Parmensis*. 2022;92(6):e2021313.
- 366 36. Austevoll IM, Hermansen E, Fagerland MW, Storheim K, Brox JI, Solberg T, et al.  
367 Decompression with or without Fusion in Degenerative Lumbar Spondylolisthesis. *The New England*  
368 *journal of medicine*. 2021;385(6):526-38.
- 369 37. Davison MA, Lilly DT, Moreno J, Bagley C, Adogwa O. A comparison of successful versus failed  
370 nonoperative treatment approaches in patients with degenerative conditions of the lumbar spine.  
371 *Journal of clinical neuroscience : official journal of the Neurosurgical Society of Australasia*.  
372 2021;86:71-8.
- 373 38. Tschugg A, Kavakebi P, Hartmann S, Lener S, Wipplinger C, Löscher WN, et al. Clinical and  
374 radiological effect of medialized cortical bone trajectory for lumbar pedicle screw fixation in patients  
375 with degenerative lumbar spondylolisthesis: study protocol for a randomized controlled trial (mPACT).  
376 *Trials*. 2018;19(1):129.
- 377 39. Chang MC, Choo YJ, Lee GW. Pedicle screws versus cortical screws in posterior lumbar  
378 interbody fusion surgery for degenerative spondylolisthesis: a systematic review and meta-analysis.  
379 *The Spine Journal*. 2021;21(7):1126-34.
- 380 40. Sakaura H, Miwa T, Yamashita T, Kuroda Y, Ohwada T. Posterior lumbar interbody fusion with  
381 cortical bone trajectory screw fixation versus posterior lumbar interbody fusion using traditional  
382 pedicle screw fixation for degenerative lumbar spondylolisthesis: a comparative study. *Journal of*  
383 *neurosurgery Spine*. 2016;25(5):591-5.
- 384 41. Ding H, Hai Y, Liu Y, Guan L, Pan A, Zhang X, et al. Cortical Trajectory Fixation Versus  
385 Traditional Pedicle-Screw Fixation in the Treatment of Lumbar Degenerative Patients with  
386 Osteoporosis: A Prospective Randomized Controlled Trial. *Clinical interventions in aging*.  
387 2022;17:175-84.
- 388 42. Du X, She Y, Ou Y, Zhu Y, Luo W, Jiang D. Oblique Lateral Interbody Fusion versus  
389 Transforaminal Lumbar Interbody Fusion in Degenerative Lumbar Spondylolisthesis: A Single-Center  
390 Retrospective Comparative Study. *BioMed research international*. 2021;2021:6693446.
- 391 43. Abbasi H, Abbasi A. Oblique Lateral Lumbar Interbody Fusion (OLLIF): Technical Notes and  
392 Early Results of a Single Surgeon Comparative Study. *Cureus*. 2015;7(10):e351.
- 393 44. Li ZZ, Wang JC, Cao Z, Zhao HL, Lewandrowski KU, Yeung A. Full-Endoscopic Oblique Lateral  
394 Lumbar Interbody Fusion: A Technical Note With 1-Year Follow-Up. *International journal of spine*  
395 *surgery*. 2021;15(3):504-13.
- 396 45. Li J, Sun Y, Guo L, Zhang F, Ding W, Zhang W. Efficacy and safety of a modified lateral lumbar  
397 interbody fusion in L4-5 lumbar degenerative diseases compared with traditional XLIF and OLIF: a  
398 retrospective cohort study of 156 cases. *BMC musculoskeletal disorders*. 2022;23(1):217.
- 399 46. Limthongkul W, Chantharakomen R, Tanasansomboon T, Yingsakmongkol W, Yoong-Leong Oh J,  
400 Kotheeranurak V, et al. Comparison of Unremoved Intervertebral Disc Location Between 2 Lateral  
401 Lumbar Interbody Fusion (LLIF) Techniques. *World neurosurgery*. 2022.
- 402 47. Liu JB, Wu JL, Zuo R, Li CQ, Zhang C, Zhou Y. Does MIS-TLIF or TLIF result in better pedicle  
403 screw placement accuracy and clinical outcomes with navigation guidance? *BMC musculoskeletal*  
404 *disorders*. 2022;23(1):153.

405 48. Phani Kiran S, Sudhir G. Minimally invasive transforaminal lumbar interbody fusion - A narrative  
406 review on the present status. Journal of clinical orthopaedics and trauma. 2021;22:101592.  
407

## 408 **Declarations**

### 409 **Ethics approval and consent to participate**

410 Not applicable.

### 411 **Availability of data and materials**

412 All data generated or analysed during this study are either included in this published article or its  
413 supplementary information fles.

### 414 **Competing interests**

415 Authors declare that there is no conflict of interest regarding the publication of this paper.

### 416 **Funding**

417 Guangdong Basic and Applied Basic Research Foundation (2019A1515111171) and National Natural  
418 Science Foundation of China (82102640) were received in support of this work. The funders had no  
419 role in study design, data collection, data analysis, interpretation, writing of this report and in the  
420 decision to submit the paper for publication.

### 421 **Authors' contributions**

422 G.F. contributed to writing and data interpreting; J.Q. contributed to data analysis; Y.L. contributed to  
423 drafting and data extraction; H.L. and S.Y. contributed to data analysis and critical revisions; X.L. and  
424 S.H. contributed to study design and administration support.

### 425 **Acknowledgements**

426 Not applicable.

### 427 **Authors' information**

428 <sup>1</sup> Department of Pain Medicine, Huazhong University of Science and Technology Union Shenzhen  
429 Hospital, Shenzhen, 518060, China.

430 <sup>2</sup> Guangdong Key Laboratory for Biomedical Measurements and Ultrasound Imaging, School of  
431 Biomedical Engineering, Shenzhen University Health Science Center, Shenzhen 518060, China.

432 <sup>3</sup> Artificial Intelligence Innovation Center, Research Institute of Tsinghua, Pearl River Delta,  
433 Guangzhou, 510735, China.

434 <sup>4</sup> Department of Orthopedics, The Eighth Affiliated Hospital Sun Yat-sen University, Shenzhen,  
435 518033, China.

436 <sup>5</sup> Department of Orthopedics, Shanghai Tenth People's Hospital, Tongji University School of  
437 Medicine, Shanghai, 200072, China

438 <sup>6</sup> Spinal Pain Research Institute, Tongji University School of Medicine, Shanghai, 200072, China.

439 **Consent for publication**

440 Not applicable.

441

442 **Figure captions**

443 Figure 1. Annual publication production and the top 20 authors over time.

444 Figure 2. Research topics of lumbar spondylolisthesis over the past 3 decades.

445 Figure 3. Research trends of lumbar spondylolisthesis and international collaborations.

446

447

448

449

450

451

452

453

454

455

456

457

458

459

460

461

462

463

464

465

466

467

468

469

470

471

472

473

474

475

476

477

478

479 **Table 1. Top 20 productive and top 20 impact journals in the field of lumbar**  
 480 **spondylolisthesis.**

| Ranking | Journals ranked by articles                       | Articles | Spine-specialty | Journals ranked by h_index                        | h_index | Spine-specialty | Total Citations |
|---------|---------------------------------------------------|----------|-----------------|---------------------------------------------------|---------|-----------------|-----------------|
| 1       | SPINE                                             | 750      | yes             | SPINE                                             | 102     | yes             | 42029           |
| 2       | EUROPEAN SPINE JOURNAL                            | 361      | yes             | EUROPEAN SPINE JOURNAL                            | 49      | yes             | 10390           |
| 3       | JOURNAL OF NEUROSURGERY -SPINE                    | 255      | yes             | JOURNAL OF NEUROSURGERY-SPINE                     | 47      | yes             | 6836            |
| 4       | SPINE JOURNAL                                     | 205      | yes             | JOURNAL OF BONE AND JOINT SURGERY-AMERICAN VOLUME | 41      | no              | 7068            |
| 5       | WORLD NEUROSURGERY                                | 178      | no              | SPINE JOURNAL                                     | 39      | yes             | 4903            |
| 6       | JOURNAL OF SPINAL DISORDERS & TECHNIQUES          | 149      | yes             | JOURNAL OF SPINAL DISORDERS & TECHNIQUES          | 37      | yes             | 4741            |
| 7       | CLINICAL ORTHOPAEDICS AND RELATED RESEARCH        | 103      | no              | CLINICAL ORTHOPAEDICS AND RELATED RESEARCH        | 30      | no              | 2732            |
| 8       | CLINICAL SPINE SURGERY                            | 79       | yes             | JOURNAL OF NEUROSURGERY                           | 27      | no              | 2849            |
| 9       | BMC MUSCULOSKELETAL DISORDERS                     | 77       | no              | JOURNAL OF BONE AND JOINT SURGERY-BRITISH VOLUME  | 27      | no              | 2487            |
| 10      | JOURNAL OF BONE AND JOINT SURGERY-AMERICAN VOLUME | 75       | no              | NEUROSURGERY                                      | 27      | no              | 2332            |
| 11      | NEUROSURGERY                                      | 74       | no              | NEUROSURGICAL FOCUS                               | 26      | no              | 1715            |
| 12      | NEUROSURGICAL FOCUS                               | 73       | no              | JOURNAL OF SPINAL DISORDERS                       | 25      | yes             | 2294            |
| 13      | JOURNAL OF                                        | 57       | yes             | WORLD                                             | 19      | no              | 1453            |

|    |                                                                                  |    |     |                                                             |    |     |      |
|----|----------------------------------------------------------------------------------|----|-----|-------------------------------------------------------------|----|-----|------|
| 14 | SPINAL<br>DISORDERS<br>JOURNAL OF<br>CLINICAL<br>NEUROSCIENCE                    | 55 | no  | NEUROSURGER<br>Y<br>JOURNAL OF<br>PEDIATRIC<br>ORTHOPAEDICS | 19 | no  | 1019 |
| 15 | JOURNAL OF<br>BONE AND JOINT<br>SURGERY-BRITIS<br>H VOLUME<br>ZEITSCHRIFT<br>FUR | 53 | no  | INTERNATIONA<br>L<br>ORTHOPAEDICS                           | 14 | no  | 834  |
| 16 | ORTHOPADIE<br>UND IHRE<br>GRENZGEBIETE                                           | 53 | no  | AMERICAN<br>JOURNAL OF<br>SPORTS<br>MEDICINE                | 14 | no  | 806  |
| 17 | GLOBAL SPINE<br>JOURNAL                                                          | 49 | yes | BMC<br>MUSCULOSKEL<br>ETAL<br>DISORDERS                     | 14 | no  | 672  |
| 18 | JOURNAL OF<br>KOREAN<br>NEUROSURGICA<br>L SOCIETY                                | 49 | no  | ARCHIVES OF<br>ORTHOPAEDIC<br>AND TRAUMA<br>SURGERY         | 14 | no  | 547  |
| 19 | ASIAN SPINE<br>JOURNAL                                                           | 47 | yes | CLINICAL<br>SPINE SURGERY                                   | 14 | yes | 540  |
| 20 | JOURNAL OF<br>NEUROSURGERY                                                       | 47 | no  | JOURNAL OF<br>CLINICAL<br>NEUROSCIENCE                      | 13 | no  | 603  |

481  
482  
483  
484  
485  
486  
487  
488  
489  
490  
491  
492  
493  
494  
495  
496  
497



498 **Table 2. Top 20 productive and impact countries/regions in the field of lumbar**  
 499 **spondylolisthesis.**

| Ranking | Country/region ranked by Article productions | Article productions | Developed | Country/region ranked by average article citations | Total Citations | Average Article Citations | Developed |
|---------|----------------------------------------------|---------------------|-----------|----------------------------------------------------|-----------------|---------------------------|-----------|
| 1       | USA                                          | 1570                | yes       | SWEDEN                                             | 3591            | 47.25                     | yes       |
| 2       | CHINA                                        | 536                 | no        | UNITED KINGDOM                                     | 7742            | 45.54                     | yes       |
| 3       | JAPAN                                        | 531                 | yes       | LUXEMBOURG                                         | 42              | 42.00                     | yes       |
| 4       | KOREA                                        | 297                 | yes       | AUSTRALIA                                          | 2297            | 40.30                     | yes       |
| 5       | GERMANY                                      | 239                 | yes       | DENMARK                                            | 1849            | 39.34                     | yes       |
| 6       | FRANCE                                       | 190                 | yes       | PHILIPPINES                                        | 35              | 35.00                     | no        |
| 7       | UNITED KINGDOM                               | 170                 | yes       | USA                                                | 52829           | 33.65                     | yes       |
| 8       | CANADA                                       | 140                 | yes       | HONG KONG                                          | 30              | 30.00                     | yes       |
| 9       | ITALY                                        | 116                 | yes       | FINLAND                                            | 1820            | 26.76                     | yes       |
| 10      | TURKEY                                       | 109                 | no        | CANADA                                             | 3713            | 26.52                     | yes       |
| 11      | TAIWAN                                       | 105                 | yes       | NEW ZEALAND                                        | 340             | 26.15                     | yes       |
| 12      | SWITZERLAND                                  | 96                  | yes       | NETHERLANDS                                        | 1360            | 23.45                     | yes       |
| 13      | INDIA                                        | 85                  | no        | HUNGARY                                            | 187             | 23.38                     | yes       |
| 14      | SWEDEN                                       | 76                  | yes       | ISRAEL                                             | 946             | 22.52                     | yes       |
| 15      | FINLAND                                      | 68                  | yes       | SWITZERLAND                                        | 2099            | 21.86                     | yes       |
| 16      | NETHERLANDS                                  | 58                  | yes       | JAPAN                                              | 11336           | 21.35                     | yes       |
| 17      | AUSTRALIA                                    | 57                  | yes       | BELGIUM                                            | 401             | 21.11                     | yes       |
| 18      | DENMARK                                      | 47                  | yes       | SPAIN                                              | 856             | 20.88                     | yes       |
| 19      | ISRAEL                                       | 42                  | yes       | FRANCE                                             | 3936            | 20.72                     | yes       |
| 20      | SPAIN                                        | 41                  | yes       | ITALY                                              | 2310            | 19.91                     | yes       |

500

501

# Annual Scientific Production

Articles

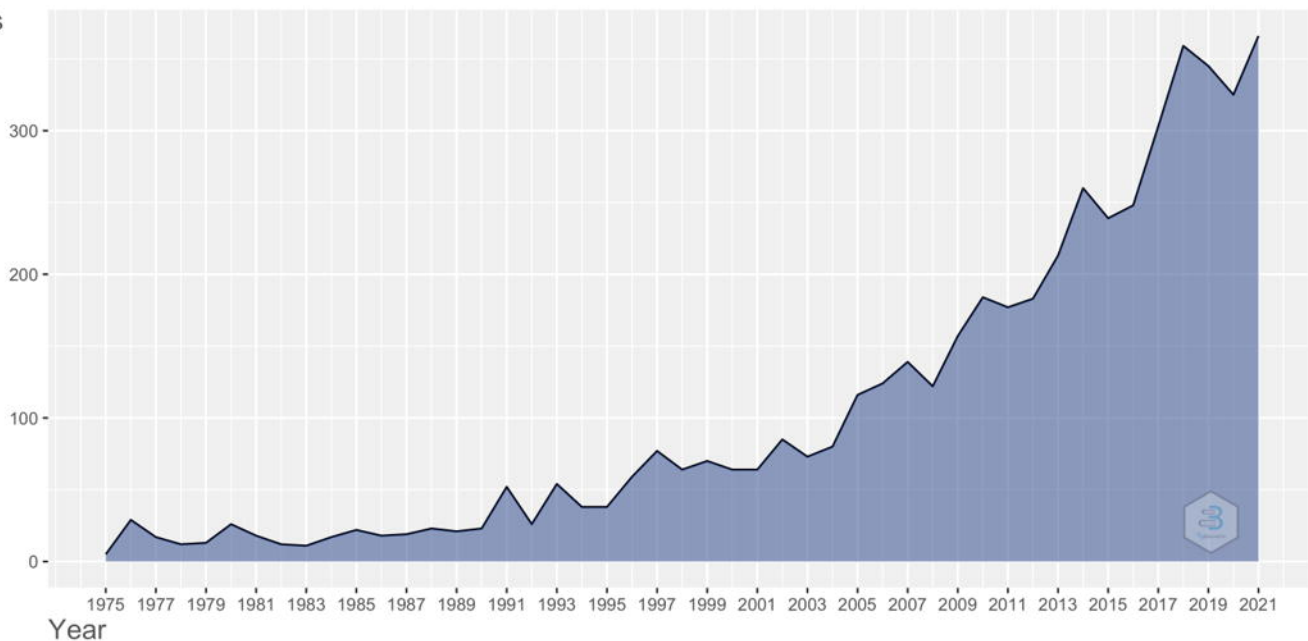

A

## Top-Authors' Production over the Time

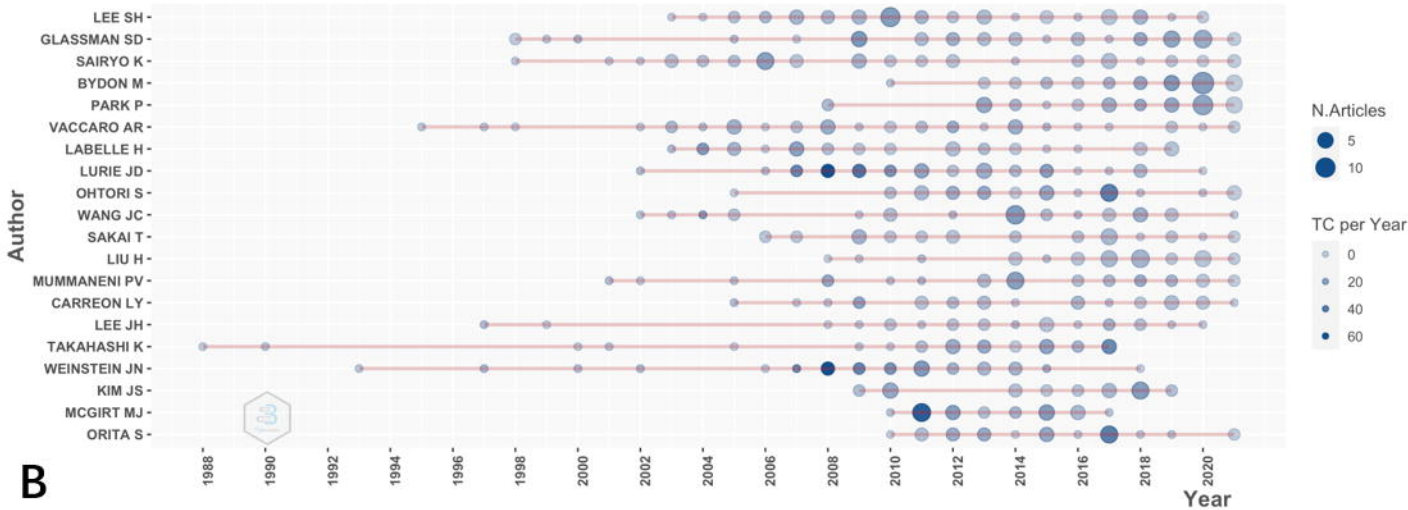

B

## Topic 1

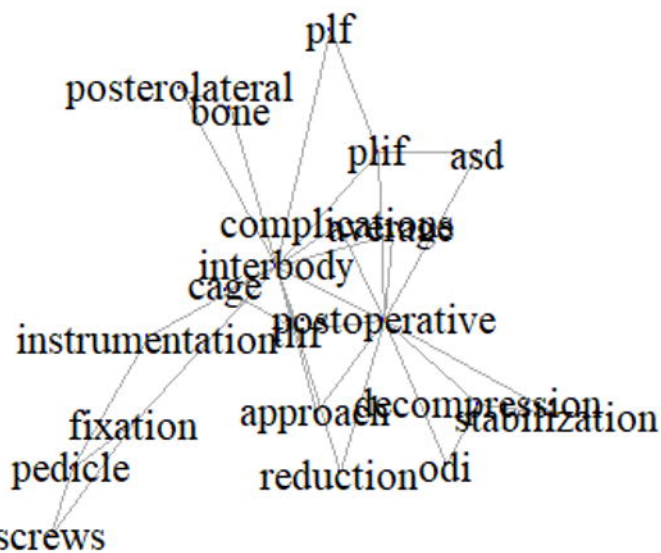

A

## Topic 2

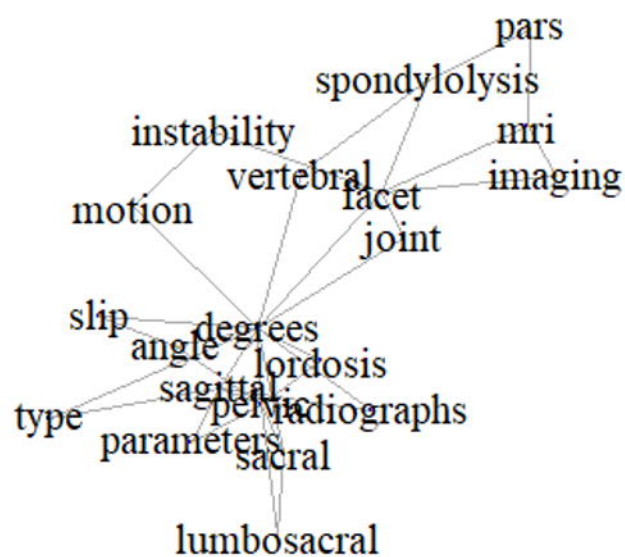

B

## Topic 3

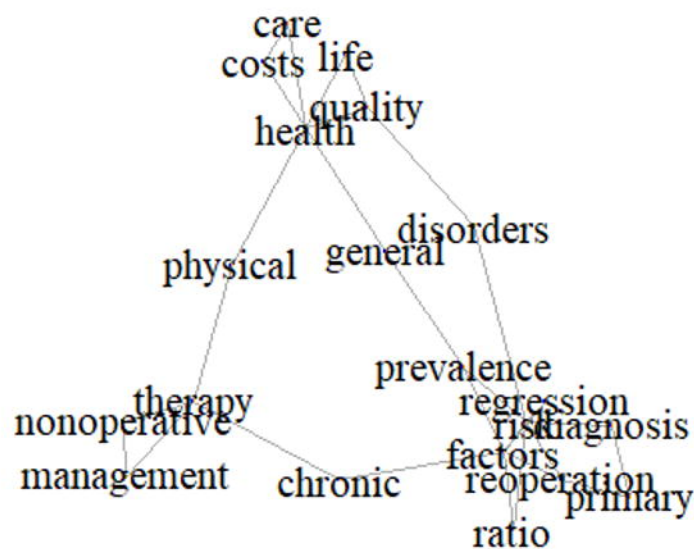

C

factor(Topic) 1 2 3

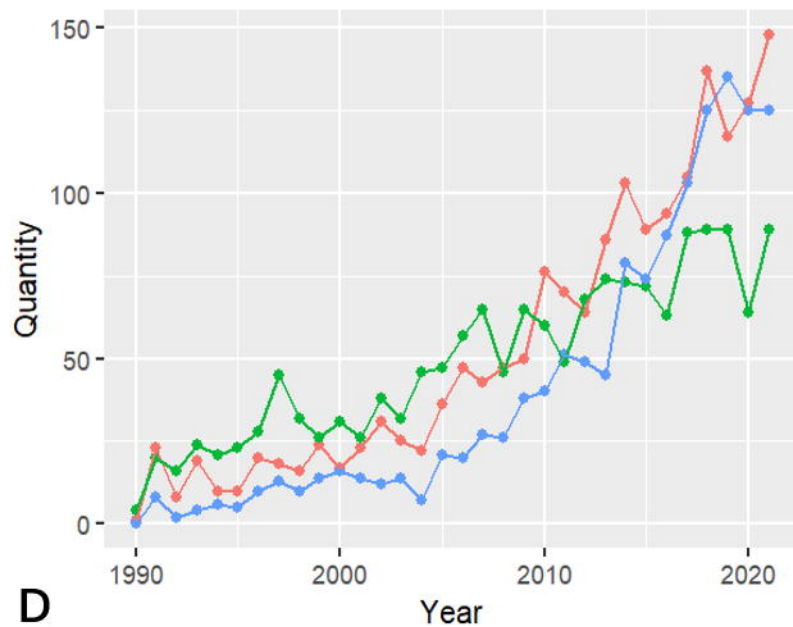

D

Term

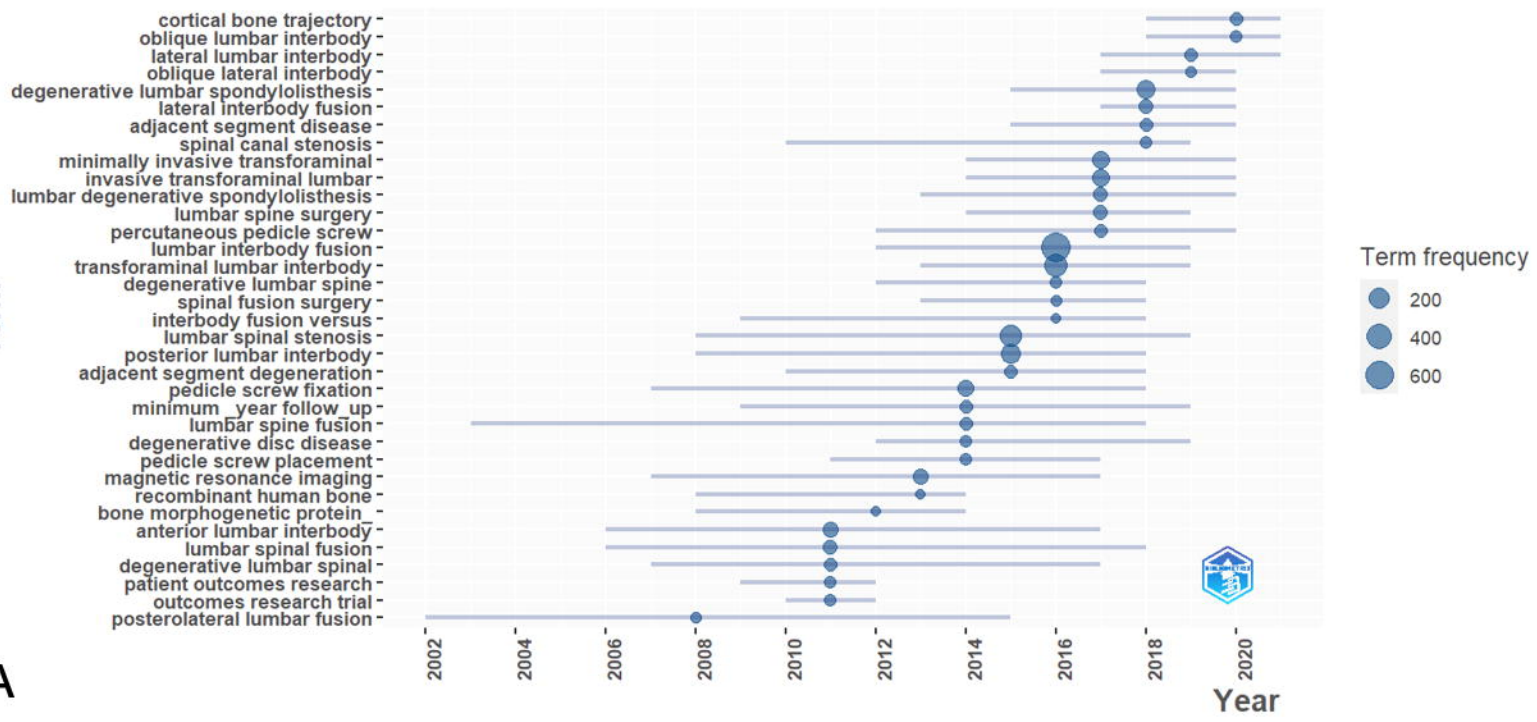

A

Longitude

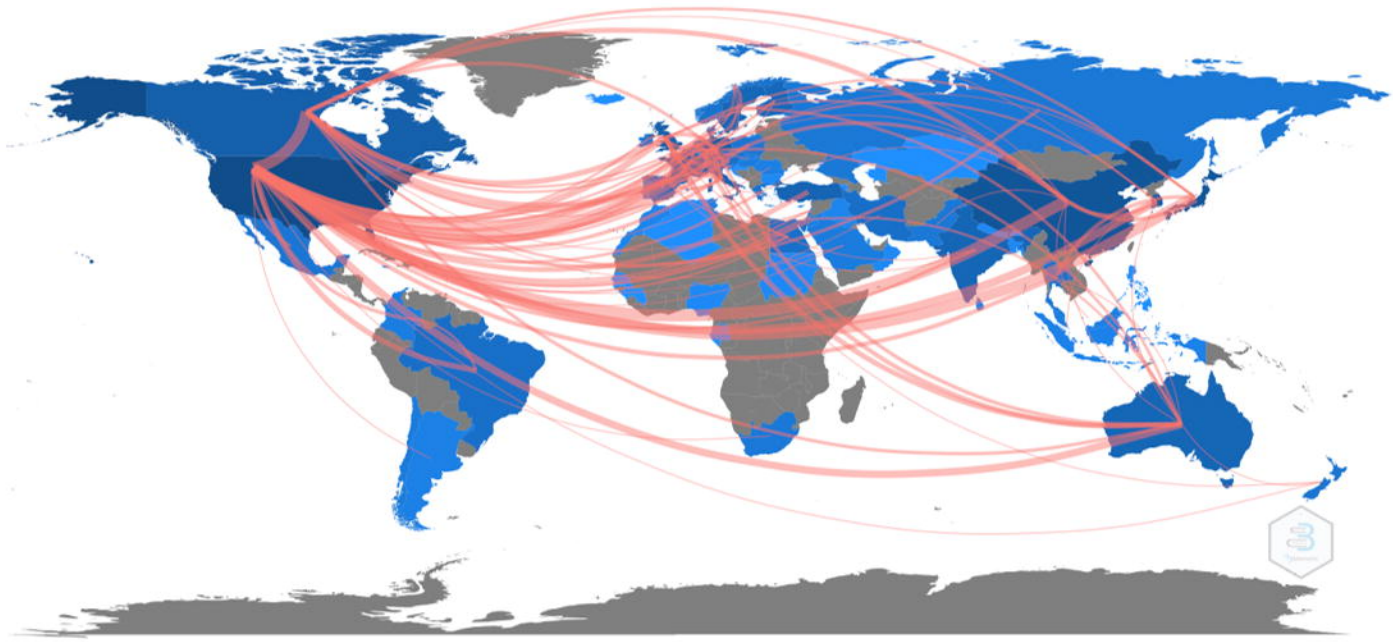

B

Latitude
